# Supplementary material for: Sustainable development: efficiency and recycling in chemicals manufacturingElectronic supplementary information (ESI) available: appendix A: calculation of carbon and inorganic waste production; appendix B: production of carbon and inorganic wastes from petrochemical processes. See http://www.rsc.org/suppdata/gc/b2/b207546f/
Source: Royal Society of Chemistry journal article supplement (doi:10.1039/b207546f), 2002-10-08
Supplement: b207546f.doc [file b207546f.doc]

# Appendix A: calculation of carbon and inorganic waste production

The C-losses of the processes were based on yield and energy losses. The yield losses included all carbons that are taken as feed but do not end up in the main product or in a sellable co-product.

The energy losses are defined as the net consumption of steam, electricity and fuel, all converted to the equivalent amount of methane to be burned. The net energy consumption results from the overall balance between import and export of energy, using the conversion factors of 46.5 lb(CH4)/MBtu for fuel, 0.050 lb(CH4)/lb(steam) for steam and 0.499 lb(CH4)/(kW*h) for power. These factors assume efficiencies of 32% and 90% for the generation of power and steam, respectively.

The olefins were assumingly manufactured by naphtha steam cracking, the BTX aromatics were assumed to come from naphtha reforming and methanol from methane partial oxidation to synthesis gas. Integrated emissions were determined by integration from Naphtha (or methane) up to the desired product, being an intermediate or a final polymer, and expressing them per C or ton of C of the given product.

The integration of C- and inorganic waste production over the whole production chain included the production of “inorganic” commodities such as O2 (via air separation), H2 and/or CO (via methane partial oxidation), NH3 (via methane reforming) H2SO4 (via S oxidation) or Cl2 (via NaCl electrolysis).

In the case of processes that produce several valuable products, e.g. steam cracker, the total C- and inorganics wasted were equally spread over all valuable products in a ratio that is identical to the carbon ratio of these products.

The consumption of catalyst was considered as inorganic waste. When available in $/ton of product, it was converted to ton/ton assuming an arbitrary cost figure of $1 per kg of catalyst. Higher true catalyst costs will of course result in an overestimation of the catalyst consumption in this study. This is e.g. the case for polyolefins, which are characterised here with unrealistically high inorganic wastes of 0.03 to 0.07 ton/ton.

Chlorine-based manufacturing routes were assumed to proceed with partially closed Cl-loop, i.e. the diluted HCl-containing effluents were not considered as waste but were assumed to be recycled back to Cl2, without energy penalty for reconcentration. This was e.g. the case for the conversion of dinitrotoluene and phosgene to TDI. On the contrary, all other Cl-containing streams were considered as waste, with the assumption that the Cl content amounts the Cl2 intake minus the Cl content of the main product and of the diluted HCl stream. These assumptions led to net Cl losses of 1.5% for phosgene manufacture, 4.3% for VCM manufacture and 54% for ECH manufacture. Obviously, the inorganic emission would be lower for a fully closed Cl-loop, though at the cost of higher energy consumption. For the Cl-manufacture, we have assumed that the overall waste is the sum of the feed intake minus the mass of Cl2 and Na (from NaOH) produced.

The heat of depolymerisation was defined per mole of monomer released. In the case of co-polymer, such as polycarbonate of polyketone, it was defined as half the heat required for releasing one of each co-monomer.

# Appendix B: Production of carbon and inorganic wastes of petrochemical processes

These data [4], which are based on open literature claims rather than manufacturing experience, present a fairly approximated - often pessimistic - description of fully integrated plants. They should therefore be used with a significant uncertainty margin.

| **Product** | **Process** | **Inorganics**  **t/t C [[1]](#footnote-2)** | **Feed loss**  **C/C** | **Energy loss**  **C/C** | **Total C-loss**  **C/C** |  |
| --- | --- | --- | --- | --- | --- | --- |
| Acetic acid | Methanol carbonyl. | 0.13 | 0.05 | 0.18 | 0.23 |  |
| Acetone | propene via cumylhydroperoxide | 0.02 | 0.11 | 0.24 | 0.35 |  |
| Adipic acid | Benzene hydrogen. + HNO3 oxidation | 0.23 | 0.44 | 0.65 | 1.09 |  |
| Ammonia | CH4 steam reformg. | 0.07 | 0.56 | 0.12 | 0.69 |  |
| Benzene | Naphtha reforming | 0.00 | 0.02 | 0.06 | 0.08 |  |
| Bisphenol-A | Phenol + acetone | 0.00 | 0.13 | 0.27 | 0.40 |  |
| Carpolactam | Cyclohexane + NH3 oxidation | 4.15 | 0.37 | 1.16 | 1.53 |  |
| Cl2 | NaCl electrol. | 0.26 | 0.00 | 1.82 | 1.82 | [[2]](#footnote-3), [[3]](#footnote-4) |
| CO | CH4 Partial oxid. | 0.00 | -0.26 | 0.03 | -0.24 | [[4]](#footnote-5) |
| Cyclo-hexane | Benzene hydrog. | 0.00 | 0.01 | 0.01 | 0.02 |  |

| **- Cont’d –Product** | **Process** | **Inorganics** | **Feed loss** | **Energy loss** | **Total C-loss** |  |
| --- | --- | --- | --- | --- | --- | --- |
| Dimethyl carbonate | MeOH oxid. Carbonyl. | 0.00 | 0.26 | 0.91 | 1.17 |  |
| Dinitrotoluene | Toluene nitration | 2.94 | 0.05 | 0.28 | 0.32 | [[5]](#footnote-6) |
| Epichloro-hydrin | from propene + Cl2 | 4.19 | 0.30 | 0.13 | 0.44 | [[6]](#footnote-7) |
| Epoxy resin | bisphenol-A + ECH | 0.41 | 0.01 | 0.15 | 0.16 | [[7]](#footnote-8) |
| Ethene | Naphtha cracking | 0.00 | 0.40 | -0.06 | 0.34 | [[8]](#footnote-9) |
| Ethene Glycol | Ethene epoxidation + hydration | 0.02 | 0.18 | 0.09 | 0.27 | 11 |
| Ethene oxide | Ethene epox. | 0.02 | 0.19 | 0.19 | 0.39 | 11 |
| H2 | CH4 SMR | 0.00 | 0.21 | -0.01 | 0.20 |  |
| 1,6-Hexyl-diamine | Butadiene hydrocyanation | 0.29 | 1.42 | 0.61 | 2.03 |  |
| HCN | CH4/NH3 oxid. | 0.03 | 0.65 | 0.15 | 0.81 |  |
| H2O2 | Anthraquinone oxid. | 0.00 | 0.00 | 0.29 | 0.29 | [[9]](#footnote-10) |
| Isopropanol | Propene hydration | 0.03 | 0.03 | 0.10 | 0.12 |  |
| Maleic anhyd. | Butane oxidation | 0.00 | 1.04 | -0.53 | 0.51 |  |
| Methanol | CH4 combiforming | 0.00 | 0.33 | 0.07 | 0.40 |  |
| Methyl-methacrylate | HCN addition to acetone | 3.14 | -0.03 | 0.26 | 0.24 |  |
| **- Cont’d –Product** | **Process** | **Inorganics** | **Feed loss** | **Energy loss** | **Total C-loss** |  |
| Nylon-6 | Caprolactam polym. | 0.02 | 0.02 | 0.27 | 0.29 |  |
| Nylon-66 | Adipic acid + hexyldiamine | 0.00 | 0.01 | 0.32 | 0.34 |  |
| O2 | Cryog. Air separat. | 0.00 | 0.00 | 0.07 | 0.07 | 3 |
| p-Xylene | Toluene transalkyl. | 0.00 | 0.10 | 0.04 | 0.14 |  |
| Propene | Naphtha cracking | 0.00 | 0.40 | -0.06 | 0.34 | 8 |
| Propene oxide | propene via SM/PO | 0.08 | 0.05 | 0.23 | 0.28 |  |
| PC | Bisphenol-A+Cl2CO | 0.59 | 0.06 | 0.39 | 0.45 | [[10]](#footnote-11) |
| PE | gas-phase polym. | 0.03 | 0.02 | 0.09 | 0.11 | [[11]](#footnote-12) |
| PET |  | 0.00 | 0.01 | 0.10 | 0.11 |  |
| Phenol | From benzene via cumylhydroperoxide | 0.02 | 0.11 | 0.24 | 0.35 |  |
| Phosgene | From CO+Cl2 | 0.19 | 0.04 | 0.17 | 0.20 | [[12]](#footnote-13) |
| PK | Ethene/CO liq. phase polym. | 0.00 | 0.08 | 0.23 | 0.32 |  |
| PMMA | Solut. Polym. | 0.03 | 0.02 | 0.28 | 0.30 |  |
| Polyols | PO+EO+Glycerine | 0.06 | 0.00 | 0.04 | 0.04 |  |
| 1,3-propane diol | EO hydroformylation | 0.05 | 0.36 | 0.83 | 1.19 |  |
| PP | Slurry polym. | 0.07 | 0.04 | 0.14 | 0.18 | 9 |
| PS | bulk polym. | 0.00 | 0.01 | 0.04 | 0.05 |  |

| **- Cont’d –Product** | **Process** | **Inorganics** | **Feed loss** | **Energy loss** | **Total C-loss** |  |
| --- | --- | --- | --- | --- | --- | --- |
| PTA | p-xylene air oxidat. | 0.11 | 0.06 | 0.34 | 0.40 |  |
| PVA | susp. polym | 0.03 | 0.05 | 0.08 | 0.13 |  |
| PVC | bulk polym | 0.00 | 0.01 | 0.06 | 0.07 |  |
| PUR | Polyols + TDI | 0.02 | 0.10 | 0.03 | 0.14 |  |
| Styrene | Alkyl.+dehydrog. | 0.00 | 0.03 | 0.13 | 0.16 |  |
| Sulfuric acid | S oxidation | 0.03 | 0.00 | -0.08 | -0.08 | 3 |
| THF | From Maleic. acid | 0.00 | 0.01 | 0.33 | 0.33 |  |
| Toluene | Naphtha reformg | 0.00 | 0.02 | 0.06 | 0.08 |  |
| TDI | dinitrotoluene.+ phosgene | 0.06 | 0.15 | 0.84 | 0.99 | [[13]](#footnote-14) |
| Vinyl acetate | Ethene acetoxyl. | 0.00 | 0.10 | 0.19 | 0.28 |  |
| Vinyl Chloride | Chlor./oxyChlor. | 0.10 | 0.04 | 0.40 | 0.44 | [[14]](#footnote-15) |

1. Includes catalyst consumption, which is estimated from reported catalyst costs and an arbitrary catalyst price of $1 /kg. [↑](#footnote-ref-2)
2. excluding C-credit for H2 by-production [↑](#footnote-ref-3)
3. waste express per O, Cl, S or N or per ton O, Cl, S, N [↑](#footnote-ref-4)
4. incl. ASU; credit for H2 incl. as 4(H/CO)*0.2(C/H) [↑](#footnote-ref-5)
5. assumes non-stoich. HNO3 as waste [↑](#footnote-ref-6)
6. waste incl. lime and non-stoichiometric Cl2 (54% Cl in), except for diluted HCl that can be recycled [↑](#footnote-ref-7)
7. phenol, phenylacetate and net MeOH included in feed; excl. Cl waste from ECH [↑](#footnote-ref-8)
8. H2 by-product neglected; C3+C4+pygas as byproduct; C1+fuel oil + resid as fuel [↑](#footnote-ref-9)
9. waste express per active oxygen [↑](#footnote-ref-10)
10. waste excl. Cl from Cl2CO [↑](#footnote-ref-11)
11. inorganic waste overestimated by assuming a catalyst cost of $1/kg [↑](#footnote-ref-12)
12. incl. non-stoichiometric Cl as waste (1.5% Cl intake) [↑](#footnote-ref-13)
13. waste based on NaOH; excl. Cl2 consumption which lead to diluted HCl (2.83 lb/lb) [↑](#footnote-ref-14)
14. count non-stoichiometric Cl as inorg. waste (4.3% Cl intake) [↑](#footnote-ref-15)
